# Supplementary material for: Self-Organizing 3D Human Neural Tissue Derived from Induced Pluripotent Stem Cells Recapitulate Alzheimer’s Disease Phenotypes
Source: PubMed Central journal article supplement (PMC5021368; doi:10.1371/journal.pone.0161969), 2016-09-13
Supplement: pone.0161969.s007.pdf [file pone.0161969.s007.pdf]

**Table S1. Cell lines used in the current study**

| Cell line code        | Source                | Gender | Diagnosis                    | Genotype               | Age at Biopsy | ApoE | Reports (PMID) | TRA-1-60 | TRA-1-81 |
|-----------------------|-----------------------|--------|------------------------------|------------------------|---------------|------|----------------|----------|----------|
| APP <sup>Dp</sup> 1-1 | Goldstein, UCSD       | Male   | Familial Alzheimer's disease | <i>APP</i> duplication | 51            | 3/3  | 22278060       | ✓        | ✓        |
| APP <sup>Dp</sup> 2-3 | Goldstein, UCSD       | Female | Familial Alzheimer's disease | <i>APP</i> duplication | 60            | 3/3  | 22278060       | ✓        | ✓        |
| ND34732               | Coriell               | Female | Familial Alzheimer's disease | <i>PSEN1</i> M146I     | 33            | 2/3  |                | ✓        | ✓        |
| AG06840               | Coriell               | Male   | Familial Alzheimer's disease | <i>PSEN1</i> A264E     | 56            | 3/3  |                | ✓        | ✓        |
| CS-0020-01            | Cohen, McLean, HMS    | Male   | Healthy                      |                        | 23            | 3/3  |                | ✓        | ✓        |
| AG09173               | Yankner, HMS, Coriell | Female | Healthy                      |                        | 75            | 3/3  |                | ✓        | ✓        |
